# Supplementary material for: A unique delaminated MoS4/OS-LEuH composite exhibiting turn-on luminescence sensing for detection of water in formamide
Source: Royal Society of Chemistry journal article supplement (doi:10.1039/c6dt04870f), 2017-01-01
Supplement: c6dt04870f1.pdf [file c6dt04870f1.pdf]

## Electronic Supplementary Information (ESI)

### **A unique delaminated MoS<sub>4</sub>/OS-LEuH composite exhibiting turn-on luminescence sensing for detection of water in formamide**

*Linxia Xie,<sup>a</sup> Chenyu Liu,<sup>a</sup> Lijiao Ma,<sup>a</sup> Chengliang Xiao,<sup>b</sup> Shulan Ma,<sup>a,\*</sup>*

*Genban Sun,<sup>a</sup> Hui Feng Li,<sup>a</sup> Xiaojing Yang<sup>a</sup>*

<sup>a</sup> Beijing Key Laboratory of Energy Conversion and Storage Materials, College of Chemistry, Beijing Normal University, Beijing 100875, China. Fax: 86 10 5880 2075; Tel: 86 10 5880 7524; E-mail: mashulan@bnu.edu.cn

<sup>b</sup> School for Radiological and Interdisciplinary Sciences (RAD-X), Collaborative Innovation Center of Radiation Medicine of Jiangsu Higher Education Institutions, Soochow University, Suzhou 215123, China

#### **Experimental details.**

**Preparation of NO<sub>3</sub>-LEuH precursor by homogeneous method.** The NO<sub>3</sub>-LEuH precursor was prepared *via* a homogeneous precipitation method under a hydrothermal condition. Firstly, 0.446 g Eu(NO<sub>3</sub>)<sub>3</sub>·6H<sub>2</sub>O (1 mmol), 1.105 g NaNO<sub>3</sub> (13 mmol), and 0.140 g hexamethylenetetramine (HMT, 1 mmol) were dissolved in deionized water (80 mL). Then, the aqueous solution at 90 °C for 12 h was heated in a Teflon-autoclave (100 mL). Finally, the obtained product was filtered, washed with deionized water and ethanol, and then vacuum-dried at 40 °C for 6 h.

**Co-intercalation of MoS<sub>4</sub><sup>2-</sup> and 1-octane sulfonate (OS<sup>-</sup>) into LEuH by an ion-**

**exchange method.** The intercalation reactions of  $\text{MoS}_4^{2-}$  and/or  $\text{OS}^-$  into LEuH were achieved by ion-exchange method using the  $\text{NO}_3$ -LDH as a precursor, and two composites of OS-LEuH and  $\text{MoS}_4/\text{OS}$ -LEuH were obtained eventually.

**Synthesis of OS-LEuH composite.** A suspension containing the 0.100 g  $\text{NO}_3$ -LEuH and 0.649 g of OS (3 mmol) in deionized water of 80 mL was heated at 70 °C for 24 h in a Teflon-autoclave (100 mL). Then, the obtained white-color product was filtered, washed with deionized water and ethanol, and vacuum-dried (40 °C for 6 h), to obtain the OS-LEuH composite.

**Synthesis of  $\text{MoS}_4/\text{OS}$ -LEuH composite.** The mixture of  $\text{NO}_3$ -LEuH (0.100 g), OS (0.610 g, 2.82 mmol), and  $(\text{NH}_4)_2\text{MoS}_4$  (0.047 g, 0.18 mmol) (the molar ratio of  $\text{OS}^-/\text{MoS}_4^{2-}$  was 94:6) was dispersed in deionized water of 80 mL, then the formed suspension was heated at 70 °C for 24 h in a Teflon-autoclave (100 mL). Similarly, the light-brown precipitate was filtered, washed with deionized water and ethanol, then vacuum-dried (40 °C for 6 h), thus the  $\text{MoS}_4/\text{OS}$ -LEuH composite was prepared.

#### **Delamination of OS-LEuH and $\text{MoS}_4/\text{OS}$ -LEuH.**

**Pure formamide (FM) system.** 0.02 g of the composite powders were dispersed respectively into 10 mL FM, followed by mechanical shaking for 16 h, to obtain their colloidal suspensions.

**FM-water system.** For exploring the effect of water on luminescence behaviors, firstly, the colloidal suspensions were prepared as the method (1), and took out 1 mL of the aforementioned suspensions to mix with 3 mL deionized water.

For further study, a series of colloidal suspensions were prepared by dispersing 0.02 g of the composite into 4 mL, 6 mL, 8 mL, 10 mL, 12 mL, 14 mL, 16 mL, 18 mL and 19 mL FM with mechanical shaking for 16 h, respectively, and then mixed with 16 mL, 14 mL, 12 mL, 10 mL, 8 mL, 6 mL, 4 mL, 2 mL, and 1 mL of deionized water. The total volume of the FM-water mixture was fixed to be 20 mL.

**DMF-water system.** A series of colloidal suspensions were prepared by dispersing 0.02 g of the composite into 4 mL, 8 mL, 14 mL, 18 mL, 19 mL, and 20 mL N,N-dimethylformamide (DMF) with mechanical shaking for 16 h, respectively,

and then mixed with 16 mL, 12 mL, 6 mL, 2 mL, 1 mL, and 0 mL of deionized water. The total volume of the DFM-water mixture was fixed to be 20 mL.

**Characterization.** The powder X-ray diffraction (XRD) patterns of the NO<sub>3</sub>-LEuH precursor and the as-prepared composites were recorded by using a Phillips X'pert Pro MPD diffractometer with Cu-K radiation at room temperature. For the large degrees, it was operated under a step size of 0.0167°, scan time of 15 seconds per step, and 2θ ranging from 4.5 to 70°. The generator setting was 40 kV and 40 mA. For the small degrees, the XRD patterns were collected with a step size of 0.008°, scan time of 30 seconds per step, and 2θ ranging from 0.6 to 6°. Fourier transformed infrared (FT-IR) spectra of the samples were recorded on a Nicolet-360 Fourier-Transform infrared spectrometer using the KBr method. Scanning electron microscope (SEM) observations were conducted via a Hitachi S-4800 microscope. The metal ion concentrations were measured by ICP-AES (Jarrel-ASH, ICAP-9000) after the solid products were dissolved in a ~0.1 M HNO<sub>3</sub> solution. CHN analysis was carried out by using an Elementar vario EL elemental analyzer. The photoluminescence spectra were measured at room temperature with a FS5 fluorescence spectroscopy. The UV-vis adsorption spectra were obtained at room temperature on a UV-2450 spectrophotometer.

**Table S1.** Chemical compositions for the NO<sub>3</sub>-LEuH precursor and the MoS<sub>4</sub>/OS-LEuH composites.

| Samples                   | Chemical formula                                                                                                                                | wt%, found (calcd) |                |                  |                |                |
|---------------------------|-------------------------------------------------------------------------------------------------------------------------------------------------|--------------------|----------------|------------------|----------------|----------------|
|                           |                                                                                                                                                 | Eu                 | Mo             | C                | H              | N              |
| NO <sub>3</sub> -LEuH     | Eu(OH) <sub>2.41</sub> (NO <sub>3</sub> ) <sub>0.49</sub> (CO <sub>3</sub> ) <sub>0.05</sub> ·0.8H <sub>2</sub> O                               | 62.10<br>(62.50)   | -              | 0.28<br>(0.25)   | 1.61<br>(1.73) | 2.71<br>(2.83) |
| OS-LEuH                   | Eu(OH) <sub>2.41</sub> (C <sub>8</sub> H <sub>17</sub> O <sub>3</sub> S) <sub>0.64</sub> NO <sub>3</sub> ) <sub>0.01</sub> ·0.8H <sub>2</sub> O | 44.72<br>(45.88)   | -              | 18.05<br>(18.52) | 4.13<br>(4.49) | 0.04<br>(0.04) |
| MoS <sub>4</sub> /OS-LEuH | Eu(OH) <sub>2.41</sub> (OS) <sub>0.48</sub> (MoS <sub>4</sub> ) <sub>0.05</sub> (NO <sub>3</sub> ) <sub>0.02</sub> ·1.8H <sub>2</sub> O         | 44.25<br>(45.84)   | 1.54<br>(1.60) | 13.74<br>(13.90) | 3.91<br>(4.27) | 0.08<br>(0.08) |

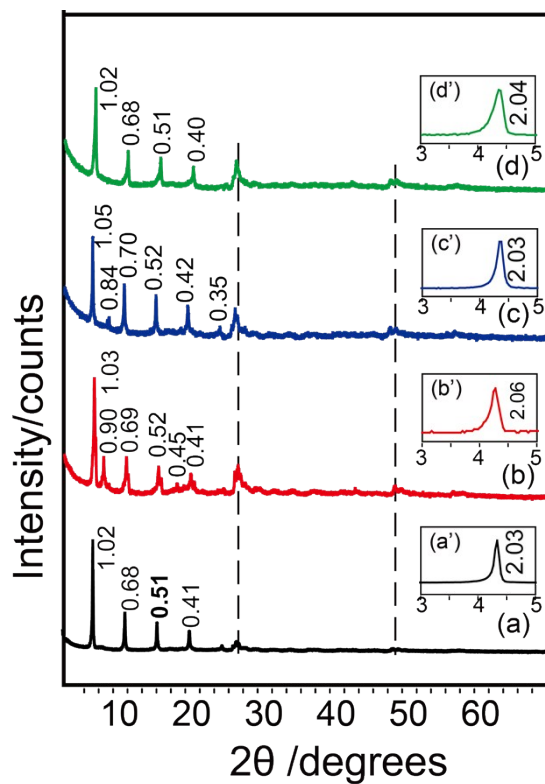

**Fig. S1** XRD patterns of composites with OS<sup>-</sup> /MoS<sub>4</sub><sup>2-</sup> molar ratios of (a) 0.98:0.02, (b) 0.94:0.06, (c) 0.90:0.10, and (d) 0.80:0.20. The *d*-values in XRD patterns were given in nanometers.

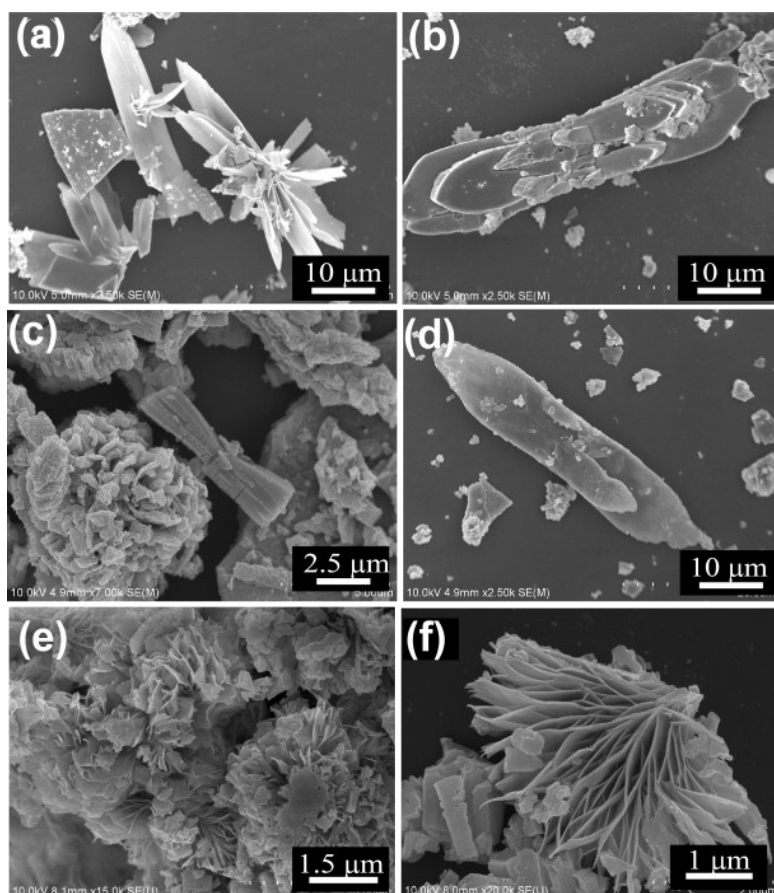

**Fig. S2** SEM images of  $\text{NO}_3\text{-LEuH}$  precursor (a, b), and the composites of OS-LEuH (c, d), and  $\text{MoS}_4/\text{OS-LEuH}$  (e, f), respectively.

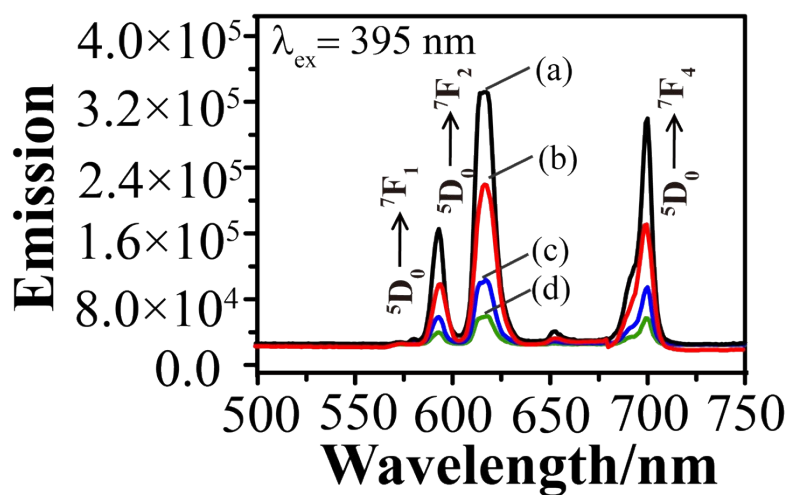

**Fig. S3** Photoluminescence emission spectra of colloidal suspensions of composites with  $\text{OS}^-/\text{MoS}_4^{2-}$  molar ratios of (a) 0.98:0.02, (b) 0.94:0.06, (c) 0.90:0.10, and (d) 0.80:0.20 ( $\lambda_{\text{ex}} = 395 \text{ nm}$ ) in pure formamide.

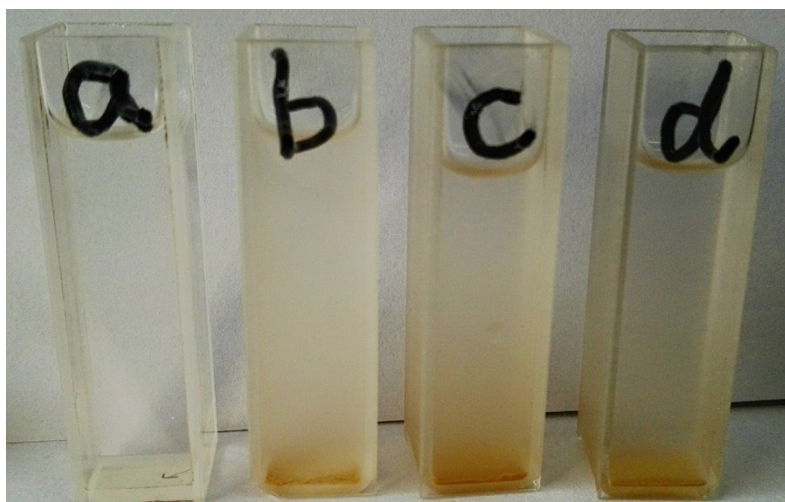

**Fig. S4** Photographs of the formed suspensions after dispersing 0.02 g MoS<sub>4</sub>/OS-LEuH powder into 20 mL of (a) DMF, (b) ethanol, (c) acetonitrile, and (d) acetone, respectively, for 16 h.

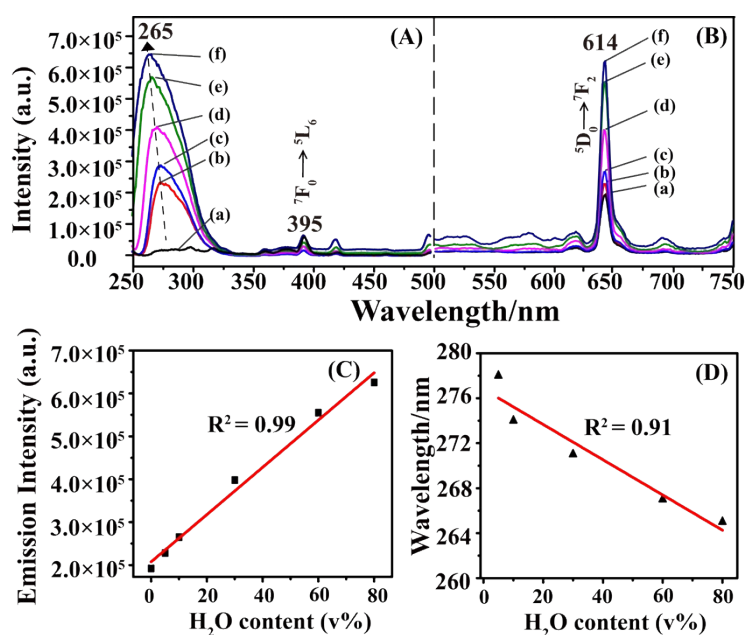

**Fig. S5** Photoluminescence (A) excitation and emission (B) spectra of colloidal suspensions of MoS<sub>4</sub>/OS-LEuH in DMF+H<sub>2</sub>O ( $x$  is volume percentages of water): (a)  $x = 0$  ( $\lambda_{\text{ex}} = 395$  nm), (b)  $x = 5\%$  ( $\lambda_{\text{ex}} = 278$  nm), (c)  $10\%$  ( $\lambda_{\text{ex}} = 274$  nm), (d)  $30\%$  ( $\lambda_{\text{ex}} = 271$  nm), (e)  $60\%$  ( $\lambda_{\text{ex}} = 267$  nm), (f)  $80\%$  ( $\lambda_{\text{ex}} = 265$  nm). Plots show the functions of emission intensity (C) and maximum excitation wavelength (D) following the water content (v %).

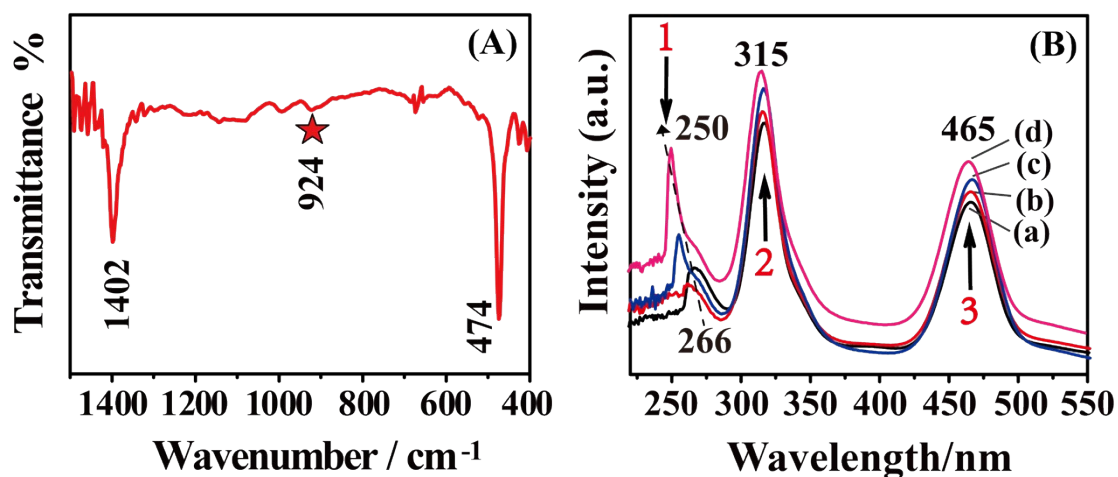

**Fig. S6** (A) Liquid IR spectra of  $\text{MoS}_4^{2-}$  in FM/ $\text{H}_2\text{O}$  (5 mg  $(\text{NH}_4)_2\text{MoS}_4$  was dissolved in 25 mL FM and 75 mL  $\text{H}_2\text{O}$ ). (B) UV-Vis absorption spectra of  $\text{MoS}_4^{2-}$ : (a) in pure FM ( $\lambda_{1,a} = 266$  nm), and in FM/ $\text{H}_2\text{O}$  system with  $\text{H}_2\text{O}$  v% of (b) 20% ( $\lambda_{1,b} = 261$  nm, 5 mg  $(\text{NH}_4)_2\text{MoS}_4$  was dissolved in 80mL FM and 20 mL  $\text{H}_2\text{O}$ ), (c) 60% ( $\lambda_{1,c} = 254$  nm, 5 mg  $(\text{NH}_4)_2\text{MoS}_4$  in 40mL FM and 60 mL  $\text{H}_2\text{O}$ ), and (d) 80% ( $\lambda_{1,d} = 250$  nm, 5 mg  $(\text{NH}_4)_2\text{MoS}_4$  in 20mL FM and 80 mL  $\text{H}_2\text{O}$ ).
